# Supplementary material for: Autophagy, Apoptosis, the Unfolded Protein Response, and Lung Function in Idiopathic Pulmonary Fibrosis
Source: MDPI journal article supplement (doi:10.3390/cells10071642), 2021-06-30
Supplement: s1 [file s1]

## Supplementary Material

### Communication

# Autophagy, Apoptosis, the Unfolded Protein Response, and Lung Function in Idiopathic Pulmonary Fibrosis

Pawan Sharma <sup>1</sup>, Javad Alizadeh <sup>2</sup>, Maya Juarez <sup>3</sup>, Afshin Samali <sup>4</sup>, Andrew J. Halayko <sup>5</sup>, Nicholas J. Kenyon <sup>3,6</sup>, Saeid Ghavami <sup>2,7,8,9,\*</sup>, Amir A. Zeki <sup>3,6,\*</sup>

**Citation:** Sharma, P.; Alizadeh, J.; Juarez, M.; Samali, A.; Halayko, A.J.; Kenyon, N.J.; Ghavami, S.; Zeki, A.A. Autophagy, Apoptosis, the Unfolded Protein Response, and Lung Function in Idiopathic Pulmonary Fibrosis. *Cells* **2021**, *10*, 1642. <https://doi.org/10.3390/cells10071642>

Academic Editor:

Mojgan Djavaheri-Mergny and Mohammad Amin Moosavi

Received: 18 April 2021

Accepted: 23 June 2021

Published: 30 June 2021

**Publisher's Note:** MDPI stays neutral with regard to jurisdictional claims in published maps and institutional affiliations.

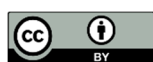

**Copyright:** © 2021 by the authors.

Licensee MDPI, Basel, Switzerland.

This article is an open access article distributed under the terms and conditions of the Creative Commons Attribution (CC BY) license (<http://creativecommons.org/licenses/by/4.0/>).

- <sup>1</sup> Center for Translational Medicine, Division of Pulmonary, Allergy and Critical Care Medicine, Jane & Leonard Korman Respiratory Institute, Sidney Kimmel Medical College, Thomas Jefferson University, Philadelphia, PA 19107, USA; pawan.sharma@jefferson.edu
- <sup>2</sup> Department of Human Anatomy and Cell Science, Max Rady College of Medicine, Rady Faculty of Health Sciences, University of Manitoba, Winnipeg, MB R3E 3P4, Canada; alizadej@myumanitoba.ca
- <sup>3</sup> Davis Lung Center, School of Medicine; Division of Pulmonary, Critical Care and Sleep Medicine, University of California, Davis, CA 95616, USA; mmjuarez@ucdavis.edu (M.J.); njkenyon@ucdavis.edu (N.J.K.)
- <sup>4</sup> Apoptosis Research Centre, School of Natural Sciences, National University of Ireland, H91 W2TY Galway, Ireland; afshin.samali@nuigalway.ie
- <sup>5</sup> Department of Physiology and Pathophysiology, Max Rady College of Medicine, Rady Faculty of Health Sciences, University of Manitoba, Winnipeg, MB R3E 3P4, Canada; andrew.halayko@umanitoba.ca
- <sup>6</sup> Veterans Affairs Medical Center, Mather, CA 95655, USA
- <sup>7</sup> Research Institute of Hematology and Oncology, Cancer Care Manitoba, Winnipeg, MB R3E 0V9, Canada
- <sup>8</sup> Faculty of Medicine, Katowice School of Technology, 40-555 Katowice, Poland
- <sup>9</sup> Autophagy Research Center, Shiraz University of Medical Sciences, Shiraz 7134845794, Iran
- \* Correspondence: aazeki@ucdavis.edu (A.A.Z.); saeid.ghavami@umanitoba.ca (S.G.)

## RESULTS

### *Corroborative Analysis of Cell Stress Markers and Lung Function*

In order to determine whether our procedure for assessing correlations between cell stress markers and lung function was valid and consistent, we conducted additional analyses using a subset of the original correlations as shown in **Figures 2 and 3**. The matching for each subject between their lung tissue cell stress marker expression and lung function were randomly re-assigned within subjects, then linear correlation analyses were conducted on this dataset.

As shown in **Figure S1A**, correlations for UPR markers XBP1 and BiP were consistent with that seen in the original analysis in **Figure 2**. XBP1% was negatively correlated with FEV1 and FVC and both were statistically significant ( $p < 0.1$ ). BiP% was also negative correlated with FEV1, FVC, and TLC ( $p < 0.1$ ). Cleaved caspase-3% was similarly negatively correlated with RV ( $p < 0.1$ ). Conversely, LC3 $\beta$  puncta% was positively correlated with DLCO ( $p < 0.1$ ) also consistent with the original analysis.

As shown in **Figure S1B**, colocalized markers of UPR and autophagy and lung function correlations were also similar to and consistent with data presented in **Figure 3**. For brevity we only evaluated a subset of those comparisons here. Colocalized XBP1 and LC3 $\beta$  puncta was positively correlated with TLC ( $p < 0.1$ ), and colocalized LC3 $\beta$  puncta and XBP1 was also positively correlated with FVC ( $p < 0.1$ ). While colocalized BiP and LC3 $\beta$  puncta were positively correlated with DLCO ( $p < 0.10$ ), colocalized LC3 $\beta$  puncta and BiP were not significantly correlated with any lung function parameters ( $p > 0.1$ , data not shown), similarly consistent with the original analysis in **Figure 3**.

### *Lung Histology of Study Subjects*

H&E staining of representative lung histology samples for both IPF and non-IPF study subjects is shown in **Figure S2**. In panel A, the IPF lungs show clear evidence of alveolar space fibrosis showing extensive collagen and extracellular matrix deposition. In panel B, the non-IPF lungs show normal-appearing alveolar spaces without evidence of fibrosis.

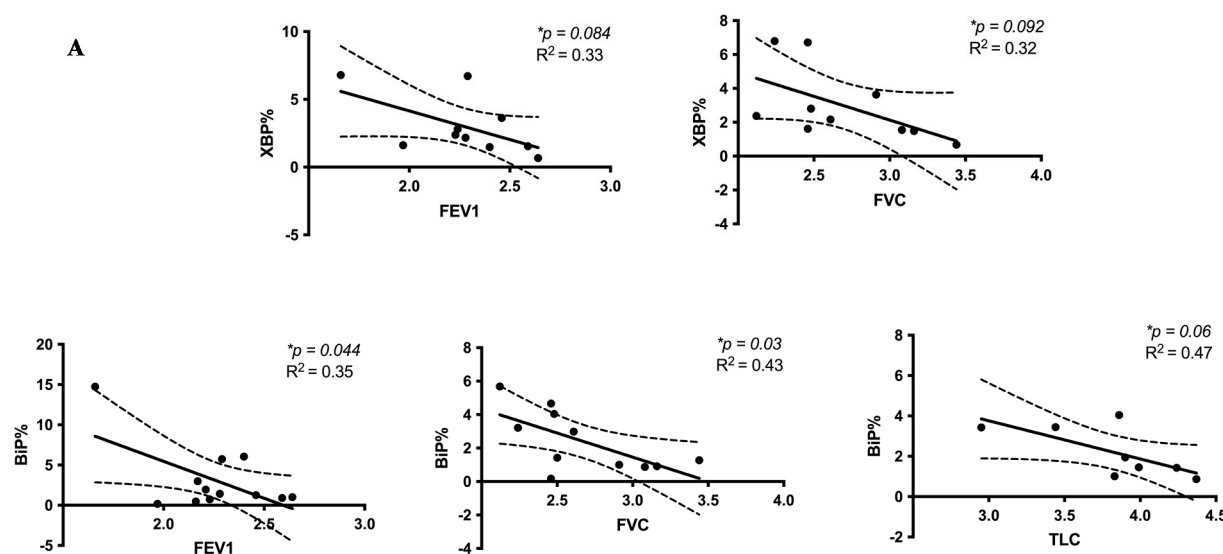

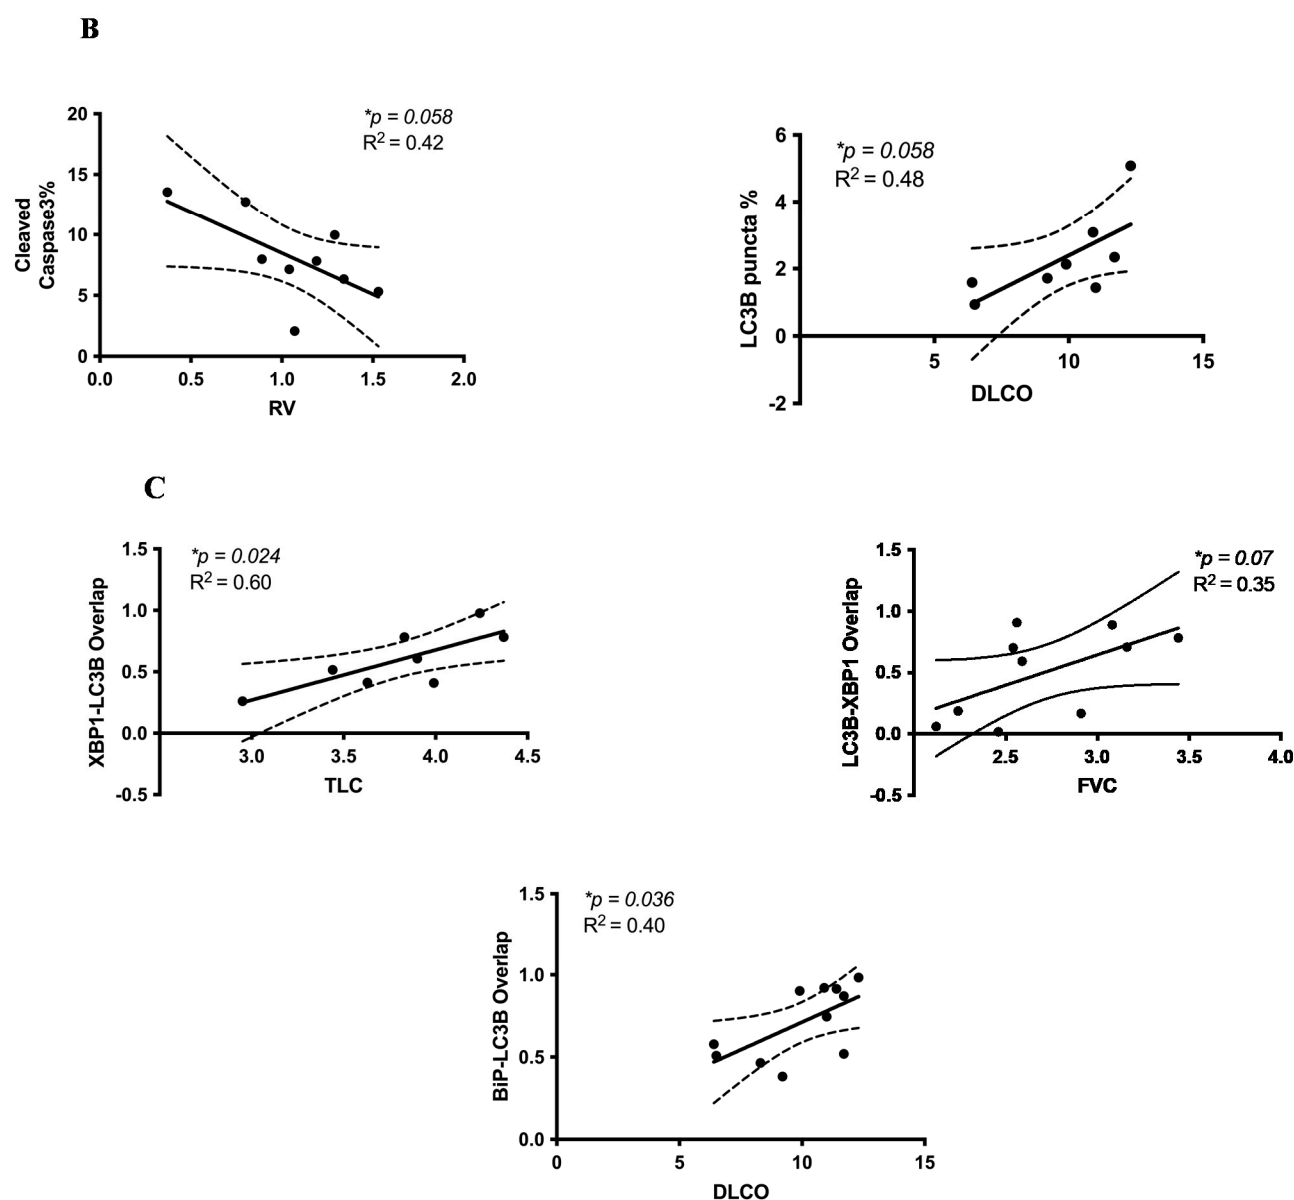

**Figure S1: Correlations of Cell Stress Markers and Lung Function after Random Assignments of Data.** (A,B) The UPR marker XBP1% was negatively correlated with FEV1 ( $*p=0.084$ ,  $R^2=0.33$ ) and FVC ( $*p=0.092$ ,  $R^2=0.32$ ). The UPR marker BiP% was similarly negatively correlated with FEV1 ( $*p=0.044$ ,  $R^2=0.35$ ), FVC ( $*p=0.03$ ,  $R^2=0.43$ ), and TLC ( $*p=0.06$ ,  $R^2=0.47$ ). The apoptosis marker cleaved caspase-3% was also negatively correlated with RV ( $*p=0.058$ ,  $R^2=0.42$ ). The autophagy marker LC3 $\beta$  puncta% was positively correlated with DLCO ( $*p=0.058$ ,  $R^2=0.48$ ). (C) Colocalized XBP1 and LC3 $\beta$  puncta was positively correlated with TLC ( $*p=0.024$ ,  $R^2=0.60$ ), colocalized LC3 $\beta$  puncta and XBP1 positively correlated with FVC ( $*p=0.07$ ,  $R^2=0.35$ ), colocalized BiP and LC3 $\beta$  puncta positively correlated with DLCO ( $*p=0.036$ ,  $R^2=0.40$ ). Confidence Intervals are included shown by the dotted curved lines flanking the regression line. Linear regression analyses were performed using GraphPad Prism 9.

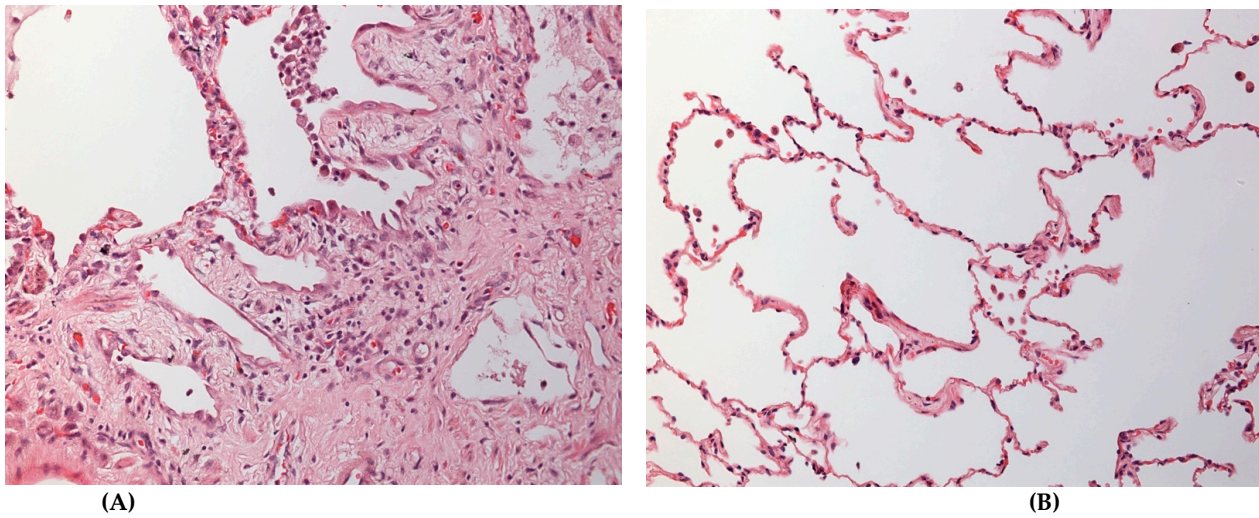

**Figure S2: Representative Lung Histopathology Images of IPF and Non-IPF Subjects.** (A) H & E stained lung section from an IPF study subject showing extensive fibrotic changes in the alveolar spaces. (B) H & E stained lung section from a non-IPF study subject showing normal non-fibrotic alveolar spaces. Both images are at 20× magnification.
